# Supplementary material for: SARS-CoV-2 Evolution among Oncological Population: In-Depth Virological Analysis of a Clinical Cohort
Source: MDPI journal article supplement (doi:10.3390/microorganisms9102145), 2021-10-14
Supplement: s1 [file s1]

**Table S1: Patients' baseline characteristics**

|                                      | <b>Total</b> |
|--------------------------------------|--------------|
|                                      | n=54         |
| <b>Demographics</b>                  |              |
| Sex (male), n (%)                    | 31 (57.4)    |
| Age, mean (sd)                       | 67.2 (14.1)  |
| <b>Oncological diagnosis, n (%)</b>  |              |
| <b>Solid</b>                         | 35 (64.8)    |
| Lung                                 | 6 (11.1)     |
| Prostate                             | 9 (16.7)     |
| Gynecologic                          | 7 (13.0)     |
| Other                                | 13 (24.1)    |
| <b>Onco-hematological, n (%)</b>     | 20 (37.0)    |
| LLC                                  | 8 (14.8)     |
| Lymphoma                             | 4 (7.4)      |
| Monoclonal gammopathy                | 3 (5.6)      |
| MDS                                  | 3 (5.6)      |
| Other                                | 2 (3.6)      |
| <b>Disease stade, n (%)</b>          |              |
| Localized                            | 33 (61.1)    |
| Disseminated                         | 21 (38.9)    |
| <b>Active treatment, n (%)</b>       | 29 (53.7)    |
| Allogeneic stem cell transplantation | 3 (5.6)      |
| Chemotherapy                         | 15 (27.8)    |
| Steroids                             | 8 (14.8)     |
| Surgery                              | 6 (11.1)     |
| Radiotherapy                         | 8 (14.8)     |
| Other                                | 14 (25.9)    |
| <b>Comorbidities, n (%)</b>          |              |
| Pulmonary disease                    | 7 (13.0)     |
| Hypertension                         | 18 (33.3)    |
| Diabetes                             | 6 (11.1)     |
| Obesity                              | 18 (33.3)    |

|                                        |             |
|----------------------------------------|-------------|
| Smoking                                | 7 (13.0)    |
| <b>Performance score, ECOG, n (%)*</b> |             |
| <b>0</b>                               | 21 (70.0)   |
| <b>1</b>                               | 6 (20.0)    |
| <b>2</b>                               | 2 (6.7)     |
| <b>3</b>                               | 1 (3.3)     |
| <b>Laboratory tests, median, (IQR)</b> |             |
| Lymphocytes                            | 1 (1.2)     |
| Thrombocytes                           | 185 (126)   |
| Neutrophils                            | 4.3 (5.1)   |
| Monocytes                              | 0.8 (0.1)   |
| CRP                                    | 95.0 (90.7) |
| LDH                                    | 297.5 (221) |

---

One patient had solid and onco-hematological cancer. Other onco-hematological disorders include Vazquez and Castleman diseases. Other treatments include immunotherapy, tyrosine kinase inhibitors, monoclonal antibodies and hormonotherapy. \*information available for 30 patients

**Table S2: Patients' COVID disease characteristics**

|                                                              | <b>Total</b><br>n=54 |
|--------------------------------------------------------------|----------------------|
| <b>Delay from SO to diagnosis, median (IQR)</b>              | 3 (6)                |
| <b>Symptoms, n, (%)</b>                                      | <b>46</b>            |
| Fever                                                        | 30 (65.2)            |
| Cough                                                        | 26 (56.5)            |
| Shortness of breath                                          | 11 (23.9)            |
| Fatigue                                                      | 7 (15.2)             |
| Rhinorrhea                                                   | 6 (13.0)             |
| Myalgia                                                      | 4 (8.7)              |
| Digestive symptoms                                           | 3 (6.5)              |
| Shivering                                                    | 3 (6.5)              |
| Sore throat                                                  | 2 (4.3)              |
| Anosmia, dysgueusia                                          | 2 (4.3)              |
| Headache                                                     | 2 (4.3)              |
| <b>Hospitalization, n (%)</b>                                | 36 (78.3)            |
| <b>Delay from diagnosis to hospitalization, median (IQR)</b> | 1 (3.3)              |
| <b>Length of stay, median (IQR)</b>                          | 15.5 (15.5)          |
| <b>Affected organ, n (%)</b>                                 | <b>32</b>            |
| Lower respiratory tract                                      | 30 (93.8)            |
| Nervous system                                               | 1 (3.1)              |
| Digestive system                                             | 5 (15.6)             |
| Kidneys                                                      | 4 (12.5)             |
| Cardiovascular                                               | 4 (12.5)             |
| <b>Co-infections, n (%)</b>                                  |                      |
| Bacterial                                                    | 3 (5.6)              |
| <b>Treatment, n (%)</b>                                      |                      |
| Oxygen                                                       | 28 (51.9)            |
| Steroids                                                     | 8 (14.8)             |
| Remdesivir                                                   | 4 (7.4)              |
| <b>Intubation, n (%)</b>                                     | 7 (12.9)             |
| <b>Intubation length, median days (IQR)</b>                  | 12 (7)               |
| <b>Death, n (%)</b>                                          | 12 (22.2)            |

Symptoms were missing for 8 patients, proportion was calculated with a total of 46; Affected organ was available for 32 patients; SO: symptom onset; IQR: interquartile range; among bacterial co-infection, 2 *S pneumoniae* and 1 *H Influenza*

**Table S3: Minority variants summary Table**

| ID patients | Minority variant nucleotide position | %      | Region       | Minority variant amino acid change |
|-------------|--------------------------------------|--------|--------------|------------------------------------|
| 2a          | C17010T                              | 9,63%  | ORF1ab       | No                                 |
| 2b          | C17010T                              | 32,32% | ORF1ab       | No                                 |
| 4a          | C15324T                              | 0,50%  | ORF1ab       | No                                 |
| 4b          | C15324T                              | 22,11% | ORF1ab       | No                                 |
| 4a          | T29685C                              | 37,74% | Untranslated | No                                 |
| 4b          | T29685C                              | 6,06%  | Untranslated | No                                 |
| 5a          | C26333T                              | 0,41%  | E gene       | T30I                               |
| 5c          | C26333T                              | 40,10% | E gene       | T30I                               |
| 6a          | T12669C                              | 15,00% | ORF1ab       | V4136A                             |
| 6b          | T12669C                              | 38,97% | ORF1ab       | V4136A                             |
| 6a          | G19802T                              | 41,03% | ORF1ab       | R6513L                             |
| 6b          | G19802T                              | 0,09%  | ORF1ab       | R6513L                             |
